# Supplementary material for: The complex interactions of physical, psychological and social frailty in elderly patients with comorbidities: a network analysis
Source: Research Square preprint supplement (doi:10.21203/rs.3.rs-7797508/v1), 2025-12-01
Supplement: Supplementary file 1 [file 3b1860a2aa9b71601403ee0a.docx]

**Supplementary Material**

**TableS1 The edge-weight matrix of the Network.**

| **Itims** | **PHY1** | **PHY2** | **PHY3** | **PHY4** | **PHY5** | **PHY6** | **PHY7** | **PHY8** | **PSY1** | **PSY2** | **PSY3** | **PSY4** | **SOC1** | **SOC2** | **SOC3** |
| --- | --- | --- | --- | --- | --- | --- | --- | --- | --- | --- | --- | --- | --- | --- | --- |
| **PHY1** |  |  |  |  |  |  |  |  |  |  |  |  |  |  |  |
| **PHY2** | 0.389 |  |  |  |  |  |  |  |  |  |  |  |  |  |  |
| **PHY3** | 0.684 | 0 |  |  |  |  |  |  |  |  |  |  |  |  |  |
| **PHY4** | 0.234 | 0 | 2.019 |  |  |  |  |  |  |  |  |  |  |  |  |
| **PHY5** | 0.361 | 0 | 0.542 | 0 |  |  |  |  |  |  |  |  |  |  |  |
| **PHY6** | 0 | 0 | 0 | 0 | 0 |  |  |  |  |  |  |  |  |  |  |
| **PHY7** | 0 | 0 | 0.958 | 0 | 0 | 0.552 |  |  |  |  |  |  |  |  |  |
| **PHY8** | 1.033 | 0 | 0.643 | 0 | 0 | 0.659 | 0.694 |  |  |  |  |  |  |  |  |
| **PSY1** | 0 | 0 | 0.347 | 0 | 0.340 | 0 | 0 | 0.666 |  |  |  |  |  |  |  |
| **PSY2** | 0.281 | 0 | 0 | 0 | 0 | 0 | 0 | 0 | 0 |  |  |  |  |  |  |
| **PSY3** | 0.276 | 0 | 0 | 0 | 0 | 0 | 0 | 0.168 | 0.379 | 2.315 |  |  |  |  |  |
| **PSY4** | 0.593 | 0 | 0.193 | 0.745 | 0.245 | 0.341 | 0.436 | 0.458 | 0.191 | 0.476 | 0 |  |  |  |  |
| **SOC1** | 0 | 0 | 0 | 0 | 0 | 0 | 0 | 0 | 0 | 0 | 0 | 0 |  |  |  |
| **SOC2** | 0.025 | 0 | 0.406 | 0 | 0 | 0.261 | 0.491 | 0.256 | 0 | 0.497 | 0.405 | 0.167 | 0.880 |  |  |
| **SOC3** | 0.213 | 0 | 0 | 0 | 0 | 0 | 0 | 0 | 0 | 0 | 0 | -0.762 | 1.232 | 0.201 |  |

Note:

**TableS2 Differences in edge connectivity in networks across age groups**

| **Item1** | **Item2** | **P-Value** | **statistic E** |
| --- | --- | --- | --- |
| PHY5 | PHY6 | 0.010 | 0.633 |
| PHY6 | PHY7 | 0.030 | 1.193 |
| PHY1 | PHY8 | 0.010 | 0.942 |
| PHY3 | PSY1 | 0.020 | 0.689 |
| PHY6 | PSY1 | 0.010 | 0.482 |
| PHY7 | PSY4 | 0.040 | 1.086 |
| PSY1 | PSY4 | 0.050 | 0.403 |
| PHY6 | SOC2 | 0.020 | 0.865 |


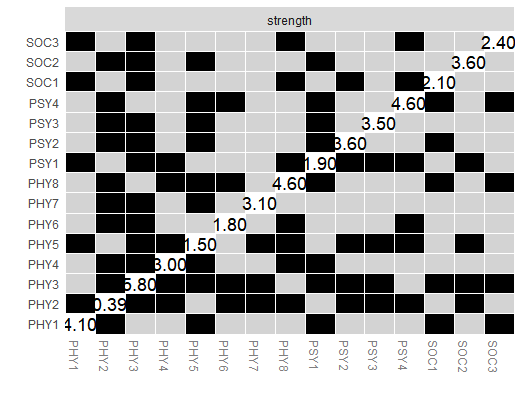


Fig S1 Nonparametric bootstrapped difference test for expectedinfluence

Note: Grey boxes indicate no significant difference, whereas black boxes indicate a statistically significant difference (*p* < 0.05). The number in the white boxes (i.e., diagonal line) represent the value of node strengths.


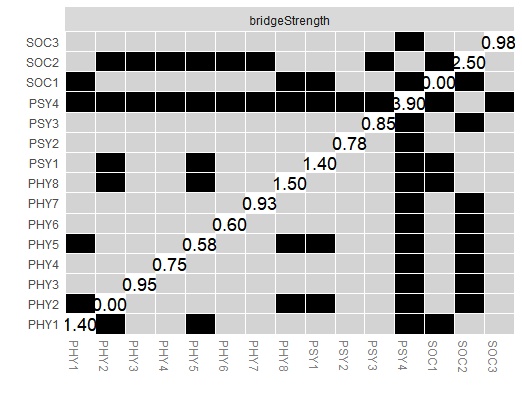


**Fig.S2.** Bootstrapped difference test for node’s bridge strength.

Note: Grey boxes indicate no significant difference, whereas black boxes indicate a statistically significant difference (*P* < 0.05).


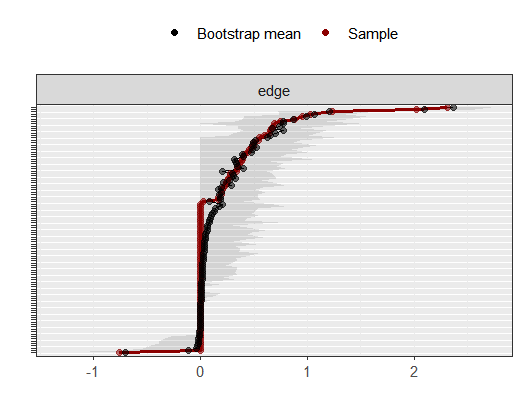


**Fig.S3.** **Nonparametric bootstrapped confidence intervals of estimated edges.**

Note: Each horizontal line represents one edge of the network. The red dots represent the sample estimates of the edge, and the black dots represent the bootstrap means of the edge. The grey areas represent the 95% confidence intervals for the edges, and narrower grey lines means better accuracy for the edges.
